# Supplementary material for: Androgen receptor increases and negative expression of GCDFP-15 in primary ductal adenocarcinoma of the lacrimal gland: a case description
Source: PubMed Central journal article supplement — Quant Imaging Med Surg. 2023 Jan 3;13(2):1200–5. doi: 10.21037/qims-22-312 (PMC9929414; doi:10.21037/qims-22-312), 2023-01-03
Supplement: qims-13-02-1200-coif.pdf [file qims-13-02-1200-coif.pdf]

## ICMJE DISCLOSURE FORM

Date:   Sep.30<sup>th</sup>     2022  

Your Name:           Shideng Yang          

Manuscript Title:   Androgen receptor increases and negative expression of GCDFP-15 in primary ductal adenocarcinoma of the lacrimal gland: a case description  

Manuscript number (if known):                   QIMS-22-312-R1                  

In the interest of transparency, we ask you to disclose all relationships/activities/interests listed below that are related to the content of your manuscript. "Related" means any relation with for-profit or not-for-profit third parties whose interests may be affected by the content of the manuscript. Disclosure represents a commitment to transparency and does not necessarily indicate a bias. If you are in doubt about whether to list a relationship/activity/interest, it is preferable that you do so.

The following questions apply to the author's relationships/activities/interests as they relate to the **current manuscript only**.

The author's relationships/activities/interests should be **defined broadly**. For example, if your manuscript pertains to the epidemiology of hypertension, you should declare all relationships with manufacturers of antihypertensive medication, even if that medication is not mentioned in the manuscript.

In item #1 below, report all support for the work reported in this manuscript without time limit. For all other items, the time frame for disclosure is the past 36 months.

|                                                           |                                                                                                                                                                                | Name all entities with whom you have this relationship or indicate none (add rows as needed) | Specifications/Comments (e.g., if payments were made to you or to your institution) |
|-----------------------------------------------------------|--------------------------------------------------------------------------------------------------------------------------------------------------------------------------------|----------------------------------------------------------------------------------------------|-------------------------------------------------------------------------------------|
| <b>Time frame: Since the initial planning of the work</b> |                                                                                                                                                                                |                                                                                              |                                                                                     |
| 1                                                         | All support for the present manuscript (e.g., funding, provision of study materials, medical writing, article processing charges, etc.)<br><b>No time limit for this item.</b> | <input checked="" type="checkbox"/> None                                                     |                                                                                     |
|                                                           |                                                                                                                                                                                |                                                                                              |                                                                                     |
|                                                           |                                                                                                                                                                                |                                                                                              |                                                                                     |
|                                                           |                                                                                                                                                                                |                                                                                              |                                                                                     |
|                                                           |                                                                                                                                                                                |                                                                                              |                                                                                     |
|                                                           |                                                                                                                                                                                |                                                                                              |                                                                                     |
| <b>Time frame: past 36 months</b>                         |                                                                                                                                                                                |                                                                                              |                                                                                     |
| 2                                                         | Grants or contracts from any entity (if not indicated in item #1 above).                                                                                                       | <input checked="" type="checkbox"/> None                                                     |                                                                                     |
|                                                           |                                                                                                                                                                                |                                                                                              |                                                                                     |
|                                                           |                                                                                                                                                                                |                                                                                              |                                                                                     |
| 3                                                         | Royalties or licenses                                                                                                                                                          | <input checked="" type="checkbox"/> None                                                     |                                                                                     |
|                                                           |                                                                                                                                                                                |                                                                                              |                                                                                     |
|                                                           |                                                                                                                                                                                |                                                                                              |                                                                                     |
| 4                                                         | Consulting fees                                                                                                                                                                | <input checked="" type="checkbox"/> None                                                     |                                                                                     |
|                                                           |                                                                                                                                                                                |                                                                                              |                                                                                     |
|                                                           |                                                                                                                                                                                |                                                                                              |                                                                                     |
| 5                                                         | Payment or honoraria for                                                                                                                                                       | <input checked="" type="checkbox"/> None                                                     |                                                                                     |

|    |                                                                                                   |                                          |  |
|----|---------------------------------------------------------------------------------------------------|------------------------------------------|--|
|    | lectures, presentations, speakers bureaus, manuscript writing or educational events               |                                          |  |
| 6  | Payment for expert testimony                                                                      | <input type="checkbox"/> None            |  |
| 7  | Support for attending meetings and/or travel                                                      | <input type="checkbox"/> None            |  |
| 8  | Patents planned, issued or pending                                                                | <input type="checkbox"/> None            |  |
| 9  | Participation on a Data Safety Monitoring Board or Advisory Board                                 | <input type="checkbox"/> None            |  |
| 10 | Leadership or fiduciary role in other board, society, committee or advocacy group, paid or unpaid | <input checked="" type="checkbox"/> None |  |
| 11 | Stock or stock options                                                                            | <input type="checkbox"/> None            |  |
| 12 | Receipt of equipment, materials, drugs, medical writing, gifts or other services                  | <input type="checkbox"/> None            |  |
| 13 | Other financial or non-financial interests                                                        | <input type="checkbox"/> None            |  |

Please summarize the above conflict of interest in the following box:

None

Please place an "X" next to the following statement to indicate your agreement:

I certify that I have answered every question and have not altered the wording of any of the questions on this form.

## ICMJE DISCLOSURE FORM

Date:  Sep.30<sup>th</sup> 2022

Your Name:  Wei Chen

Manuscript Title:  Androgen receptor increases and negative expression of GCDFP-15 in primary ductal adenocarcinoma of the lacrimal gland: a case description

Manuscript number (if known):  QIMS-22-312-R1

In the interest of transparency, we ask you to disclose all relationships/activities/interests listed below that are related to the content of your manuscript. "Related" means any relation with for-profit or not-for-profit third parties whose interests may be affected by the content of the manuscript. Disclosure represents a commitment to transparency and does not necessarily indicate a bias. If you are in doubt about whether to list a relationship/activity/interest, it is preferable that you do so.

The following questions apply to the author's relationships/activities/interests as they relate to the current manuscript only.

The author's relationships/activities/interests should be defined broadly. For example, if your manuscript pertains to the epidemiology of hypertension, you should declare all relationships with manufacturers of antihypertensive medication, even if that medication is not mentioned in the manuscript.

In item #1 below, report all support for the work reported in this manuscript without time limit. For all other items, the time frame for disclosure is the past 36 months.

|                                                           |                                                                                                                                                                                | Name all entities with whom you have this relationship or indicate none (add rows as needed) | Specifications/Comments (e.g., if payments were made to you or to your institution) |
|-----------------------------------------------------------|--------------------------------------------------------------------------------------------------------------------------------------------------------------------------------|----------------------------------------------------------------------------------------------|-------------------------------------------------------------------------------------|
| <b>Time frame: Since the initial planning of the work</b> |                                                                                                                                                                                |                                                                                              |                                                                                     |
| 1                                                         | All support for the present manuscript (e.g., funding, provision of study materials, medical writing, article processing charges, etc.)<br><b>No time limit for this item.</b> | <input checked="" type="checkbox"/> None                                                     |                                                                                     |
|                                                           |                                                                                                                                                                                |                                                                                              |                                                                                     |
|                                                           |                                                                                                                                                                                |                                                                                              |                                                                                     |
|                                                           |                                                                                                                                                                                |                                                                                              |                                                                                     |
|                                                           |                                                                                                                                                                                |                                                                                              |                                                                                     |
|                                                           |                                                                                                                                                                                |                                                                                              |                                                                                     |
| <b>Time frame: past 36 months</b>                         |                                                                                                                                                                                |                                                                                              |                                                                                     |
| 2                                                         | Grants or contracts from any entity (if not indicated in item #1 above).                                                                                                       | <input checked="" type="checkbox"/> None                                                     |                                                                                     |
|                                                           |                                                                                                                                                                                |                                                                                              |                                                                                     |
| 3                                                         | Royalties or licenses                                                                                                                                                          | <input checked="" type="checkbox"/> None                                                     |                                                                                     |
|                                                           |                                                                                                                                                                                |                                                                                              |                                                                                     |
| 4                                                         | Consulting fees                                                                                                                                                                | <input checked="" type="checkbox"/> None                                                     |                                                                                     |
|                                                           |                                                                                                                                                                                |                                                                                              |                                                                                     |
| 5                                                         | Payment or honoraria for                                                                                                                                                       | <input checked="" type="checkbox"/> None                                                     |                                                                                     |

|    |                                                                                                   |                                          |  |
|----|---------------------------------------------------------------------------------------------------|------------------------------------------|--|
|    | lectures, presentations, speakers bureaus, manuscript writing or educational events               |                                          |  |
| 6  | Payment for expert testimony                                                                      | <input type="checkbox"/> None            |  |
| 7  | Support for attending meetings and/or travel                                                      | <input type="checkbox"/> None            |  |
| 8  | Patents planned, issued or pending                                                                | <input type="checkbox"/> None            |  |
| 9  | Participation on a Data Safety Monitoring Board or Advisory Board                                 | <input type="checkbox"/> None            |  |
| 10 | Leadership or fiduciary role in other board, society, committee or advocacy group, paid or unpaid | <input checked="" type="checkbox"/> None |  |
| 11 | Stock or stock options                                                                            | <input type="checkbox"/> None            |  |
| 12 | Receipt of equipment, materials, drugs, medical writing, gifts or other services                  | <input type="checkbox"/> None            |  |
| 13 | Other financial or non-financial interests                                                        | <input type="checkbox"/> None            |  |

Please summarize the above conflict of interest in the following box:

None

Please place an "X" next to the following statement to indicate your agreement:

I certify that I have answered every question and have not altered the wording of any of the questions on this form.

## ICMJE DISCLOSURE FORM

Date:   Sep.30<sup>th</sup>     2022  

Your Name:   Wen Chen  

Manuscript Title:   Androgen receptor increases and negative expression of GCDFP-15 in primary ductal adenocarcinoma of the lacrimal gland: a case description  

Manuscript number (if known):           QIMS-22-312-R1  

In the interest of transparency, we ask you to disclose all relationships/activities/interests listed below that are related to the content of your manuscript. "Related" means any relation with for-profit or not-for-profit third parties whose interests may be affected by the content of the manuscript. Disclosure represents a commitment to transparency and does not necessarily indicate a bias. If you are in doubt about whether to list a relationship/activity/interest, it is preferable that you do so.

The following questions apply to the author's relationships/activities/interests as they relate to the **current manuscript only**.

The author's relationships/activities/interests should be **defined broadly**. For example, if your manuscript pertains to the epidemiology of hypertension, you should declare all relationships with manufacturers of antihypertensive medication, even if that medication is not mentioned in the manuscript.

In item #1 below, report all support for the work reported in this manuscript without time limit. For all other items, the time frame for disclosure is the past 36 months.

|                                                           |                                                                                                                                                                                | Name all entities with whom you have this relationship or indicate none (add rows as needed) | Specifications/Comments (e.g., if payments were made to you or to your institution) |
|-----------------------------------------------------------|--------------------------------------------------------------------------------------------------------------------------------------------------------------------------------|----------------------------------------------------------------------------------------------|-------------------------------------------------------------------------------------|
| <b>Time frame: Since the initial planning of the work</b> |                                                                                                                                                                                |                                                                                              |                                                                                     |
| 1                                                         | All support for the present manuscript (e.g., funding, provision of study materials, medical writing, article processing charges, etc.)<br><b>No time limit for this item.</b> | <input checked="" type="checkbox"/> None                                                     |                                                                                     |
|                                                           |                                                                                                                                                                                |                                                                                              |                                                                                     |
|                                                           |                                                                                                                                                                                |                                                                                              |                                                                                     |
|                                                           |                                                                                                                                                                                |                                                                                              |                                                                                     |
|                                                           |                                                                                                                                                                                |                                                                                              |                                                                                     |
|                                                           |                                                                                                                                                                                |                                                                                              |                                                                                     |
| <b>Time frame: past 36 months</b>                         |                                                                                                                                                                                |                                                                                              |                                                                                     |
| 2                                                         | Grants or contracts from any entity (if not indicated in item #1 above).                                                                                                       | <input checked="" type="checkbox"/> None                                                     |                                                                                     |
|                                                           |                                                                                                                                                                                |                                                                                              |                                                                                     |
| 3                                                         | Royalties or licenses                                                                                                                                                          | <input checked="" type="checkbox"/> None                                                     |                                                                                     |
|                                                           |                                                                                                                                                                                |                                                                                              |                                                                                     |
| 4                                                         | Consulting fees                                                                                                                                                                | <input checked="" type="checkbox"/> None                                                     |                                                                                     |
|                                                           |                                                                                                                                                                                |                                                                                              |                                                                                     |
| 5                                                         | Payment or honoraria for                                                                                                                                                       | <input checked="" type="checkbox"/> None                                                     |                                                                                     |

|    |                                                                                                   |                                          |  |
|----|---------------------------------------------------------------------------------------------------|------------------------------------------|--|
|    | lectures, presentations, speakers bureaus, manuscript writing or educational events               |                                          |  |
| 6  | Payment for expert testimony                                                                      | <input type="checkbox"/> None            |  |
| 7  | Support for attending meetings and/or travel                                                      | <input checked="" type="checkbox"/> None |  |
| 8  | Patents planned, issued or pending                                                                | <input type="checkbox"/> None            |  |
| 9  | Participation on a Data Safety Monitoring Board or Advisory Board                                 | <input type="checkbox"/> None            |  |
| 10 | Leadership or fiduciary role in other board, society, committee or advocacy group, paid or unpaid | <input checked="" type="checkbox"/> None |  |
| 11 | Stock or stock options                                                                            | <input type="checkbox"/> None            |  |
| 12 | Receipt of equipment, materials, drugs, medical writing, gifts or other services                  | <input type="checkbox"/> None            |  |
| 13 | Other financial or non-financial interests                                                        | <input type="checkbox"/> None            |  |

Please summarize the above conflict of interest in the following box:

None

Please place an "X" next to the following statement to indicate your agreement:

I certify that I have answered every question and have not altered the wording of any of the questions on this form.

## ICMJE DISCLOSURE FORM

Date:  Sep.30<sup>th</sup> 2022

Your Name:  Guoping Sun

Manuscript Title:  Androgen receptor increases and negative expression of GCDFP-15 in primary ductal adenocarcinoma of the lacrimal gland: a case description

Manuscript number (if known):  QIMS-22-312-R1

In the interest of transparency, we ask you to disclose all relationships/activities/interests listed below that are related to the content of your manuscript. "Related" means any relation with for-profit or not-for-profit third parties whose interests may be affected by the content of the manuscript. Disclosure represents a commitment to transparency and does not necessarily indicate a bias. If you are in doubt about whether to list a relationship/activity/interest, it is preferable that you do so.

The following questions apply to the author's relationships/activities/interests as they relate to the **current manuscript only**.

The author's relationships/activities/interests should be **defined broadly**. For example, if your manuscript pertains to the epidemiology of hypertension, you should declare all relationships with manufacturers of antihypertensive medication, even if that medication is not mentioned in the manuscript.

In item #1 below, report all support for the work reported in this manuscript without time limit. For all other items, the time frame for disclosure is the past 36 months.

|                                                           |                                                                                                                                                                                | Name all entities with whom you have this relationship or indicate none (add rows as needed) | Specifications/Comments (e.g., if payments were made to you or to your institution) |
|-----------------------------------------------------------|--------------------------------------------------------------------------------------------------------------------------------------------------------------------------------|----------------------------------------------------------------------------------------------|-------------------------------------------------------------------------------------|
| <b>Time frame: Since the initial planning of the work</b> |                                                                                                                                                                                |                                                                                              |                                                                                     |
| 1                                                         | All support for the present manuscript (e.g., funding, provision of study materials, medical writing, article processing charges, etc.)<br><b>No time limit for this item.</b> | <input checked="" type="checkbox"/> None                                                     |                                                                                     |
|                                                           |                                                                                                                                                                                |                                                                                              |                                                                                     |
|                                                           |                                                                                                                                                                                |                                                                                              |                                                                                     |
|                                                           |                                                                                                                                                                                |                                                                                              |                                                                                     |
|                                                           |                                                                                                                                                                                |                                                                                              |                                                                                     |
|                                                           |                                                                                                                                                                                |                                                                                              |                                                                                     |
| <b>Time frame: past 36 months</b>                         |                                                                                                                                                                                |                                                                                              |                                                                                     |
| 2                                                         | Grants or contracts from any entity (if not indicated in item #1 above).                                                                                                       | <input checked="" type="checkbox"/> None                                                     |                                                                                     |
|                                                           |                                                                                                                                                                                |                                                                                              |                                                                                     |
| 3                                                         | Royalties or licenses                                                                                                                                                          | <input checked="" type="checkbox"/> None                                                     |                                                                                     |
|                                                           |                                                                                                                                                                                |                                                                                              |                                                                                     |
| 4                                                         | Consulting fees                                                                                                                                                                | <input checked="" type="checkbox"/> None                                                     |                                                                                     |
|                                                           |                                                                                                                                                                                |                                                                                              |                                                                                     |
| 5                                                         | Payment or honoraria for                                                                                                                                                       | <input checked="" type="checkbox"/> None                                                     |                                                                                     |

|    |                                                                                                   |                                          |  |
|----|---------------------------------------------------------------------------------------------------|------------------------------------------|--|
|    | lectures, presentations, speakers bureaus, manuscript writing or educational events               |                                          |  |
| 6  | Payment for expert testimony                                                                      | <input type="checkbox"/> None            |  |
| 7  | Support for attending meetings and/or travel                                                      | <input checked="" type="checkbox"/> None |  |
| 8  | Patents planned, issued or pending                                                                | <input type="checkbox"/> None            |  |
| 9  | Participation on a Data Safety Monitoring Board or Advisory Board                                 | <input type="checkbox"/> None            |  |
| 10 | Leadership or fiduciary role in other board, society, committee or advocacy group, paid or unpaid | <input checked="" type="checkbox"/> None |  |
| 11 | Stock or stock options                                                                            | <input type="checkbox"/> None            |  |
| 12 | Receipt of equipment, materials, drugs, medical writing, gifts or other services                  | <input type="checkbox"/> None            |  |
| 13 | Other financial or non-financial interests                                                        | <input type="checkbox"/> None            |  |

Please summarize the above conflict of interest in the following box:

None

Please place an "X" next to the following statement to indicate your agreement:

I certify that I have answered every question and have not altered the wording of any of the questions on this form.



## ICMJE DISCLOSURE FORM

Date:  Sep.30<sup>th</sup> 2022

Your Name:  Ming Zhang

Manuscript Title:  Androgen receptor increases and negative expression of GCDFP-15 in primary ductal adenocarcinoma of the lacrimal gland: a case description

Manuscript number (if known):  QIMS-22-312-R1

In the interest of transparency, we ask you to disclose all relationships/activities/interests listed below that are related to the content of your manuscript. "Related" means any relation with for-profit or not-for-profit third parties whose interests may be affected by the content of the manuscript. Disclosure represents a commitment to transparency and does not necessarily indicate a bias. If you are in doubt about whether to list a relationship/activity/interest, it is preferable that you do so.

The following questions apply to the author's relationships/activities/interests as they relate to the current manuscript only.

The author's relationships/activities/interests should be defined broadly. For example, if your manuscript pertains to the epidemiology of hypertension, you should declare all relationships with manufacturers of antihypertensive medication, even if that medication is not mentioned in the manuscript.

In item #1 below, report all support for the work reported in this manuscript without time limit. For all other items, the time frame for disclosure is the past 36 months.

|                                                           |                                                                                                                                                                                | Name all entities with whom you have this relationship or indicate none (add rows as needed) | Specifications/Comments (e.g., if payments were made to you or to your institution) |
|-----------------------------------------------------------|--------------------------------------------------------------------------------------------------------------------------------------------------------------------------------|----------------------------------------------------------------------------------------------|-------------------------------------------------------------------------------------|
| <b>Time frame: Since the initial planning of the work</b> |                                                                                                                                                                                |                                                                                              |                                                                                     |
| 1                                                         | All support for the present manuscript (e.g., funding, provision of study materials, medical writing, article processing charges, etc.)<br><b>No time limit for this item.</b> | <input checked="" type="checkbox"/> None                                                     |                                                                                     |
|                                                           |                                                                                                                                                                                |                                                                                              |                                                                                     |
|                                                           |                                                                                                                                                                                |                                                                                              |                                                                                     |
|                                                           |                                                                                                                                                                                |                                                                                              |                                                                                     |
|                                                           |                                                                                                                                                                                |                                                                                              |                                                                                     |
|                                                           |                                                                                                                                                                                |                                                                                              |                                                                                     |
| <b>Time frame: past 36 months</b>                         |                                                                                                                                                                                |                                                                                              |                                                                                     |
| 2                                                         | Grants or contracts from any entity (if not indicated in item #1 above).                                                                                                       | <input checked="" type="checkbox"/> None                                                     |                                                                                     |
|                                                           |                                                                                                                                                                                |                                                                                              |                                                                                     |
| 3                                                         | Royalties or licenses                                                                                                                                                          | <input checked="" type="checkbox"/> None                                                     |                                                                                     |
|                                                           |                                                                                                                                                                                |                                                                                              |                                                                                     |
| 4                                                         | Consulting fees                                                                                                                                                                | <input checked="" type="checkbox"/> None                                                     |                                                                                     |
|                                                           |                                                                                                                                                                                |                                                                                              |                                                                                     |
| 5                                                         | Payment or honoraria for                                                                                                                                                       | <input checked="" type="checkbox"/> None                                                     |                                                                                     |

|    |                                                                                                   |                                          |  |
|----|---------------------------------------------------------------------------------------------------|------------------------------------------|--|
|    | lectures, presentations, speakers bureaus, manuscript writing or educational events               |                                          |  |
| 6  | Payment for expert testimony                                                                      | <input type="checkbox"/> None            |  |
| 7  | Support for attending meetings and/or travel                                                      | <input type="checkbox"/> None            |  |
| 8  | Patents planned, issued or pending                                                                | <input type="checkbox"/> None            |  |
| 9  | Participation on a Data Safety Monitoring Board or Advisory Board                                 | <input type="checkbox"/> None            |  |
| 10 | Leadership or fiduciary role in other board, society, committee or advocacy group, paid or unpaid | <input checked="" type="checkbox"/> None |  |
| 11 | Stock or stock options                                                                            | <input type="checkbox"/> None            |  |
| 12 | Receipt of equipment, materials, drugs, medical writing, gifts or other services                  | <input type="checkbox"/> None            |  |
| 13 | Other financial or non-financial interests                                                        | <input type="checkbox"/> None            |  |

Please summarize the above conflict of interest in the following box:

None

Please place an "X" next to the following statement to indicate your agreement:

I certify that I have answered every question and have not altered the wording of any of the questions on this form.

## ICMJJE DISCLOSURE FORM

Date:   Sep.30<sup>th</sup>     2022  

Your Name:   Yuxin Fan  

Manuscript Title:   Androgen receptor increases and negative expression of GCDFP-15 in primary ductal adenocarcinoma of the lacrimal gland: a case description  

Manuscript number (if known):                   QIMS-22-312-R1                  

In the interest of transparency, we ask you to disclose all relationships/activities/interests listed below that are related to the content of your manuscript. "Related" means any relation with for-profit or not-for-profit third parties whose interests may be affected by the content of the manuscript. Disclosure represents a commitment to transparency and does not necessarily indicate a bias. If you are in doubt about whether to list a relationship/activity/interest, it is preferable that you do so.

The following questions apply to the author's relationships/activities/interests as they relate to the **current manuscript only**.

The author's relationships/activities/interests should be **defined broadly**. For example, if your manuscript pertains to the epidemiology of hypertension, you should declare all relationships with manufacturers of antihypertensive medication, even if that medication is not mentioned in the manuscript.

In item #1 below, report all support for the work reported in this manuscript without time limit. For all other items, the time frame for disclosure is the past 36 months.

|                                                           |                                                                                                                                                                                | Name all entities with whom you have this relationship or indicate none (add rows as needed) | Specifications/Comments (e.g., if payments were made to you or to your institution) |
|-----------------------------------------------------------|--------------------------------------------------------------------------------------------------------------------------------------------------------------------------------|----------------------------------------------------------------------------------------------|-------------------------------------------------------------------------------------|
| <b>Time frame: Since the initial planning of the work</b> |                                                                                                                                                                                |                                                                                              |                                                                                     |
| 1                                                         | All support for the present manuscript (e.g., funding, provision of study materials, medical writing, article processing charges, etc.)<br><b>No time limit for this item.</b> | <input checked="" type="checkbox"/> None                                                     |                                                                                     |
|                                                           |                                                                                                                                                                                |                                                                                              |                                                                                     |
|                                                           |                                                                                                                                                                                |                                                                                              |                                                                                     |
|                                                           |                                                                                                                                                                                |                                                                                              |                                                                                     |
|                                                           |                                                                                                                                                                                |                                                                                              |                                                                                     |
|                                                           |                                                                                                                                                                                |                                                                                              |                                                                                     |
| <b>Time frame: past 36 months</b>                         |                                                                                                                                                                                |                                                                                              |                                                                                     |
| 2                                                         | Grants or contracts from any entity (if not indicated in item #1 above).                                                                                                       | <input checked="" type="checkbox"/> None                                                     |                                                                                     |
|                                                           |                                                                                                                                                                                |                                                                                              |                                                                                     |
| 3                                                         | Royalties or licenses                                                                                                                                                          | <input checked="" type="checkbox"/> None                                                     |                                                                                     |
|                                                           |                                                                                                                                                                                |                                                                                              |                                                                                     |
| 4                                                         | Consulting fees                                                                                                                                                                | <input checked="" type="checkbox"/> None                                                     |                                                                                     |
|                                                           |                                                                                                                                                                                |                                                                                              |                                                                                     |
| 5                                                         | Payment or honoraria for                                                                                                                                                       | <input checked="" type="checkbox"/> None                                                     |                                                                                     |

|    |                                                                                                   |                                          |  |
|----|---------------------------------------------------------------------------------------------------|------------------------------------------|--|
|    | lectures, presentations, speakers bureaus, manuscript writing or educational events               |                                          |  |
| 6  | Payment for expert testimony                                                                      | <input type="checkbox"/> None            |  |
| 7  | Support for attending meetings and/or travel                                                      | <input checked="" type="checkbox"/> None |  |
| 8  | Patents planned, issued or pending                                                                | <input type="checkbox"/> None            |  |
| 9  | Participation on a Data Safety Monitoring Board or Advisory Board                                 | <input type="checkbox"/> None            |  |
| 10 | Leadership or fiduciary role in other board, society, committee or advocacy group, paid or unpaid | <input checked="" type="checkbox"/> None |  |
| 11 | Stock or stock options                                                                            | <input type="checkbox"/> None            |  |
| 12 | Receipt of equipment, materials, drugs, medical writing, gifts or other services                  | <input type="checkbox"/> None            |  |
| 13 | Other financial or non-financial interests                                                        | <input type="checkbox"/> None            |  |

Please summarize the above conflict of interest in the following box:

None

Please place an "X" next to the following statement to indicate your agreement:

I certify that I have answered every question and have not altered the wording of any of the questions on this form.
